1  
2  
3  
4  
5  
6  
7  
8  
9  
10  
11  
12  
13  
14  
15  
16  
17  
18  
19  
20  
21  
22  
23  
24  
25  
26  
27  
28  
29  
30  
31  
32  
33  
34  
35  
36  
37

**Cryptic adaptor protein interactions regulate DNA replication initiation**

Lindsay A. Matthews and Lyle A. Simmons\*

Molecular, Cellular, and Developmental Biology. University of Michigan, Ann Arbor, MI 48109-1048, USA.

\*Corresponding author

E-mail: [lasimm@umich.edu](mailto:lasimm@umich.edu) (LAS)

38 **Abstract**

39 DNA replication is a fundamental biological process that is tightly regulated in all living  
40 cells. In bacteria, the master regulator DnaA controls when and where replication begins  
41 by building a step-wise complex that loads the replicative helicase onto chromosomal  
42 DNA. In many bacteria, DnaA requires the adaptor proteins DnaD and DnaB to aid DnaA  
43 during helicase loading. How DnaA, its adaptors, and the helicase form a complex at the  
44 origin is largely unknown. In this study, we addressed this long-standing question by  
45 disassembling the initiation proteins into their individual domains and testing all possible  
46 pair-wise combinations in a bacterial two-hybrid assay. Here we report a full description  
47 of the cryptic interaction sites used by the helicase loading machinery from *Bacillus*  
48 *subtilis*. In addition, we investigated how complex formation of the helicase loading  
49 machinery is regulated by the checkpoint protein SirA, which is a potent replication  
50 inhibitor in sporulating cells. We found that SirA and the DnaD adaptor bind overlapping  
51 sites on DnaA, and therefore SirA acts as a competitive inhibitor to block initiation. The  
52 interaction between DnaA and DnaD was also mapped to the same DnaA surface in the  
53 human pathogen *Staphylococcus aureus*, demonstrating the broad conservation of this  
54 interface. Therefore, our approach has unveiled key protein interactions essential for  
55 initiation and is widely applicable for mapping interactions in other signaling pathways  
56 that are governed by cryptic binding surfaces.

57

58 **Author Summary**

59 In order to proliferate, bacteria must first build a step-wise protein complex on their  
60 chromosomes that determines when and where DNA replication begins. This protein

## *Cryptic Interactions Regulate Initiation*

61 complex is assembled through dynamic interactions that have been difficult to study and  
62 remain largely uncharacterized. Here we show that by deconstructing the proteins into  
63 their constituent domains, the interactions used to build the initiation complex can be  
64 readily detected and mapped to single amino acid resolution. Using this approach, we  
65 demonstrate that DNA replication is controlled through conformational changes that  
66 dictate the availability of interaction surfaces. In addition, negative regulators can also  
67 block DNA replication by influencing complex formation so that cells survive  
68 inhospitable conditions. Initiation proteins from the model organism *B. subtilis* and the  
69 human pathogen *S. aureus* were both used to underscore the general applicability of  
70 the results to different bacterial systems. Furthermore, our general strategy for mapping  
71 dynamic protein interactions is suitable for many different signaling pathways that are  
72 controlled through cryptic interaction surfaces.

73

## 74 **Introduction**

75 All cells use a dedicated replicative helicase loading pathway to ensure DNA  
76 replication begins at the right time and place. Bacteria use the master regulator DnaA to  
77 recognize the origin of replication (*oriC*) and induce melting of the origin DNA (1). DnaA  
78 then recruits the replicative helicase with its associated loader, representing the first step  
79 in replication fork assembly. DnaA is widely conserved, but importantly its mechanism  
80 differs between Gram-positive and Gram-negative species. In *Escherichia coli*, DnaA  
81 recruits the replicative helicase through a direct interaction (2,3). In contrast, the Gram-  
82 positive model organism *B. subtilis* requires the essential adaptor proteins DnaD and

## *Cryptic Interactions Regulate Initiation*

83 DnaB to allow for helicase loading. Specifically, DnaA recruits DnaD to the origin first;  
84 DnaD then recruits DnaB; and, finally, DnaB recruits and helps load the helicase (4).

85 Interactions involving the DnaD and DnaB adaptors are tightly regulated and  
86 therefore add a layer of control over origin firing that is not present in Gram-negative  
87 systems. For example, *B. subtilis* is able to sporulate as a means of surviving inhospitable  
88 conditions and DNA replication initiation must be prevented during sporulation. This  
89 inhibition is due to a small protein called SirA that is only produced once the cell is  
90 committed to sporulate (5,6). SirA directly binds to a hot spot on the DnaA initiator and  
91 acts as a potent inhibitor of its activity (7,8). Though the mechanism of action is unknown,  
92 SirA prevents DnaA from accumulating at the origin and recruiting the DnaD and DnaB  
93 adaptors (7).

94 DnaD and DnaB share similar protein architectures and are conserved among  
95 Gram-positive bacteria with low GC-content, which includes many human pathogens  
96 such as *Staphylococcus aureus*, *Listeria monocytogenes*, *Streptococcus pneumoniae*,  
97 and *Bacillus anthracis* (9). In addition to DnaA, other types of initiators also use DnaD  
98 and DnaB to load the replicative helicase. For example, PriA uses DnaD and DnaB to  
99 restart stalled replication forks and some plasmid initiators use DnaD and DnaB during  
100 plasmid duplication (10–12). Multi-drug resistance plasmids and phage genomes can also  
101 express their own versions of DnaD- and DnaB-like adaptor proteins when replicating in  
102 low GC-content Gram-positive hosts (13,14). Therefore, determining how DnaD and  
103 DnaB function is critical for understanding DNA replication in multiple contexts. To this  
104 end, we sought to determine if and how interactions mediated by the DnaD and DnaB  
105 adaptors are regulated.

## *Cryptic Interactions Regulate Initiation*

106 Interactions involving the DnaD and DnaB adaptors have been difficult to study  
107 using traditional screening methods. The DnaA and DnaD interaction gives mixed results  
108 in yeast two-hybrid assays depending on the experimental conditions (15). In contrast,  
109 DnaD and DnaB do not generate any signals with each other in yeast two-hybrid assays  
110 (13,15,16). There is some evidence that DnaD and DnaB can weakly interact *in vitro*  
111 (12,17), though currently the strongest support of a direct interaction is a gain-of-function  
112 mutation in DnaB that generates a robust interaction with DnaD and increases the  
113 frequency of initiation *in vivo* (13). This gain-of-function mutation (S371P) has been  
114 mapped to the C-terminus of DnaB and likely induces a conformational change, though it  
115 is unclear if this mimics a physiological process. Consequently, there is a pressing need  
116 to establish a method for detecting interactions with the wild type DnaD and DnaB  
117 adaptors.

118 To investigate how the DnaD and DnaB adaptors control replication initiation, we  
119 used a bacterial two-hybrid (B2H) assay to map their interaction surfaces. While the full-  
120 length initiation proteins did not interact, specific combinations of isolated domains from  
121 DnaA, DnaD, DnaB, and the replicative helicase produced robust signals. Using this  
122 approach, the interaction between DnaA and DnaD was mapped to the same hot spot  
123 used by the SirA inhibitor. Therefore, we propose that SirA acts as a competitive inhibitor  
124 for the DnaD adaptor. In addition, we found that DnaD used its N-terminal winged helix  
125 domain to mediate all of its interactions, while DnaB instead favored its C-terminal domain  
126 to bind to its partners. Together, these results indicate that protein interactions at the *B.*  
127 *subtilis* origin are controlled through conformational changes that expose cryptic  
128 interaction surfaces to build a step-wise initiation complex.

## 129 **Results**

### 130 **Identification of interaction sites in initiation proteins**

131 A B2H assay was used to detect interactions between the *B. subtilis* initiation  
132 proteins (**Fig 1A**). Positive interactions generate cyclic AMP within a *cya- E. coli* host cell,  
133 which can be detected as blue colonies in the presence of X-Gal or growth using maltose  
134 as the only carbon source (18). Both DnaD and DnaB homo-oligomerize (12) and these  
135 self-interactions could be readily detected in the assay (**Fig 1B**). In contrast, DnaD and  
136 DnaB did not interact with each other or with DnaA under the same conditions (**Fig 1C**).  
137 As a further control, a DnaB variant with the S371P gain-of-function mutation was also  
138 used (13), which generated a signal within the B2H assay as expected (**Fig 1C**).

139 As we could not detect interactions between the full-length proteins, we chose an  
140 alternative strategy to map their interaction surfaces. DnaA, DnaD, and DnaB were  
141 separated into their constituent domains (**Fig 2A**) and tested against each other in all  
142 possible pairwise combinations using both X-Gal and minimal media containing maltose  
143 to determine positive interactions. This approach ensures that all potential binding sites  
144 hidden in the conformation favored by the full-length protein are exposed.

145 To test that the domain boundaries were correct, we purified each individual  
146 domain from the DnaD and DnaB adaptors and found they could fold as stable products  
147 (**Fig 2B**). For DnaA, we tested its domains with known binding partners in the B2H. DnaA  
148 domain I (DnaA<sup>DI</sup>) was found to interact with the SirA inhibitor (8) while DnaA domain III  
149 (DnaA<sup>DIII</sup>) interacted with YabA as expected (19) (**Fig 2C**). Therefore, the individual  
150 domains appear to be suitable for screening in the B2H assay as they are stable and  
151 exhibit other known functions.

## *Cryptic Interactions Regulate Initiation*

152 For the DnaA-DnaD interaction, we found that the winged helix domain from DnaD  
153 (DnaD<sup>WHD</sup>) interacted with DnaA<sup>DI</sup> (**Fig 2C**). DnaD<sup>WHD</sup> also interacted with its downstream  
154 partner, DnaB, but in this case the signal was split between the DnaB winged helix domain  
155 (DnaB<sup>WHD</sup>) and its second C-terminal domain (DnaB<sup>CTD2</sup>) (**Fig 2D**). These results were  
156 also corroborated when using growth on minimal media containing maltose (**S1 Fig**). The  
157 winged helix domain of DnaD mediates a dimer-tetramer equilibrium; however,  
158 expressing DnaD<sup>WHD</sup> on its own shifts the equilibrium to favor the tetrameric form (20).  
159 We entertained the possibility that the tetrameric form of DnaD<sup>WHD</sup> specifically interacts  
160 with its protein partners. To test this directly, DnaD<sup>WHD</sup> was truncated to prevent its  
161 tetramerization as determined by size exclusion chromatography, but this did not disturb  
162 any of the B2H signals (**S2 Fig**). Therefore, it is unlikely that the oligomeric state of DnaD  
163 dictates its interaction status. Instead, our results indicate that full-length DnaA, DnaD  
164 and DnaB may undergo conformational changes to expose cryptic binding sites and form  
165 stable complexes with each other during initiation.

166 The same B2H method was also used to map the interaction between the DnaB  
167 adaptor and the replicative helicase (called DnaC in *B. subtilis*; not to be confused with  
168 the DnaC loader from *E. coli*). The major signal came from DnaB<sup>CTD2</sup> interacting with the  
169 C-terminal end of the helicase (DnaC<sup>CTD</sup>), though weak signals with DnaC<sup>NTD</sup> were also  
170 apparent (**Fig 2E**). The zinc binding domain of the *B. subtilis* ATPase loader (called Dnal)  
171 is also known to interact with the C-terminal end of the DnaC helicase, but interactions  
172 between Dnal and DnaC<sup>NTD</sup> have not been investigated (16,21–23). Therefore, the Dnal  
173 domains (**Fig 2A**) were screened against the DnaC helicase domains. We found that the  
174 Dnal zinc binding domain (Dnal<sup>ZBD</sup>) can interact with both the N- and C-terminal ends of

## *Cryptic Interactions Regulate Initiation*

175 the helicase (**Fig 2F**). These results were also reproduced using growth on minimal media  
176 supplemented with maltose (**S3 Fig**). Therefore, we suggest that DnaI may have multiple  
177 interaction modes with the replicative helicase during loading.

178

### 179 **The DnaD wing interacts with the DnaA initiator**

180 After identifying all of the interacting domains, we chose to focus on the interaction  
181 between DnaA and DnaD as this is likely the most regulated step of the helicase loading  
182 pathway. The ConSurf server was used to map conserved residues on the DnaD<sup>WHD</sup>  
183 crystal structure [PDB 2V79 (20)] and reveal potential interaction sites (24–27). A  
184 conserved patch was found in a cleft formed by the  $\beta$ -strands of the wing in DnaD<sup>WHD</sup>  
185 (**Fig 3A**). When the conserved hydrophobic cleft residues F51 and I83 were mutated to  
186 alanines the interaction with DnaA<sup>DI</sup> was lost (**Fig 3B**). Furthermore, reducing the length  
187 of the loop ( $\Delta$ loop) in the DnaD<sup>WHD</sup> wing (20) also disrupted binding to DnaA<sup>DI</sup> (**Fig 3B**).  
188 This indicates that the DnaD wing region is necessary for forming a complex with DnaA.

189 To ensure the F51A and I83A DnaD<sup>WHD</sup> mutations did not cause structural defects,  
190 we purified both variants and verified that they could tetramerize using size exclusion  
191 chromatography (data not shown) and chemical cross-linking (**Fig 3C**). Tetramerization  
192 uses surfaces distal to the wing and is therefore an excellent test for wide-ranging  
193 structural defects (20). We also found that the DnaD<sup>WHD</sup> wing variants could still interact  
194 with DnaB (**Fig 3B**), which further indicates they are structurally sound. Note that the  
195 DnaD<sup>WHD</sup>  $\Delta$ loop variant was previously found to be stable and therefore was not tested  
196 (20).



## *Cryptic Interactions Regulate Initiation*

197 To test if the wing region is also critical in full-length DnaD, we used a temperature  
198 sensitive *B. subtilis* strain (*dnaD23*) where the native DnaD protein is not functional at  
199 48°C (28). Ectopically expressing the F51A or I83A full-length DnaD variants from the  
200 *amyE* locus did not rescue this strain at the restrictive temperature (**Fig 4A**). Therefore,  
201 the DnaD wing is also required for function *in vivo*.

202 Overexpressing DnaD in *B. subtilis* causes a growth defect that manifests in small  
203 colony sizes. This phenotype depends on DNA binding by DnaD but is independent of its  
204 interaction with DnaA (9). Consequently, we predicted that if the F51A and I83A DnaD  
205 variants were only defective in binding DnaA, but not in other functions, they should also  
206 induce a small colony phenotype when overexpressed. The *dnaD23* strains used in Fig  
207 4A were therefore incubated with high levels of xylose at the permissive temperature.  
208 Under these conditions, both F51A and I83A DnaD produced small colonies (**Fig 4B**),  
209 which suggests functions outside of DnaA binding are still preserved.

210

### **DnaD and SirA bind the same interaction hot spot in DnaA**

212 As SirA and DnaD both bind to DnaA<sup>DI</sup>, we asked whether they compete for the  
213 same binding site. SirA binds to an interaction hot spot on DnaA<sup>DI</sup> that intriguingly cannot  
214 tolerate mutations *in vivo* despite the fact that the interaction with SirA is not essential (8).  
215 We hypothesized that DnaD may also bind to this DnaA<sup>DI</sup> hot spot and that mutating this  
216 region is lethal because it knocks out the interaction with the DnaD adaptor.

217 To test our hypothesis, six different DnaA<sup>DI</sup> variants were used: three with  
218 mutations on the hot spot that are lethal in *B. subtilis* (T26A, W27A, and F49A) (8) and  
219 three with mutations on the same surface that are still viable *in vivo* (N47A, F49Y, and

## *Cryptic Interactions Regulate Initiation*

220 A50V) (7). In the B2H assay, only the mutations that are lethal in *B. subtilis* knocked out  
221 the interaction with DnaD (**Fig 5A**). As a control, the DnaA variants were also tested  
222 against SirA where they all knocked out the interaction (**Fig 4D**), with the exception of  
223 T26A which is consistent with previous studies (8). Therefore, DnaD and SirA bind to  
224 overlapping surfaces on DnaA<sup>DI</sup>.

225 As crystal structures of both partners are available, we also modeled the complex  
226 between DnaD<sup>WHD</sup> and DnaA<sup>DI</sup> using the Rosetta docking algorithm (29–31). This model  
227 predicted a hydrophobic interaction surface on DnaD consisting of I83, F51 and the  
228 aliphatic portion of the E95 sidechain (**Fig 5B**). DnaA<sup>DI</sup> docks on this hydrophobic surface  
229 using T26, W27 and F49 (**Fig 5B**). Therefore, the residues identified through our B2H  
230 assays are predicted to be in direct contact within the complex.

231 The DnaD crystal structure indicated that I83 may serve a structural role by  
232 packing against I76 and stabilizing the DnaD wing (**Fig 5B**). We entertained the possibility  
233 that mutating I83 increases the flexibility of the wing region by destroying this anchoring  
234 point; however, this is unlikely to be the reason the interaction with DnaA was lost as  
235 mutating the other isoleucine involved (I76A) did not prevent DnaA binding (**Fig 5C**).  
236 Therefore, we concluded that I83 is directly important for complex formation.

237

### 238 ***S. aureus* DnaA binds its cognate DnaD adaptor using the domain I hot spot**

239 SirA and DnaD bind to overlapping surfaces on the DnaA domain I hot spot, which  
240 indicates these two factors compete with each other during early stages of sporulation.  
241 Interestingly, the domain I hot spot is widely conserved across DnaA homologs (32). This

## *Cryptic Interactions Regulate Initiation*

242 led us to ask if the DnaA hot spot also recruits DnaD to the origin in species that lack  
243 SirA, or whether these organisms instead evolved a different interaction site (**Fig 6A**).

244 To test this possibility, we used the human pathogen *S. aureus* because it lacks a  
245 SirA homolog. DnaA and DnaD from *S. aureus* (herein referred to as SaDnaA and  
246 SaDnaD) interacted in a B2H using domain I from SaDnaA and the winged helix domain  
247 from SaDnaD (**Fig 6B**). The hot spot residues equivalent to T26, W27 and F49 in *B.*  
248 *subtilis* DnaA (T25, F26, and F48 in SaDnaA) were then mutated to alanines (**Fig 6C**).  
249 Mutating the two aromatic residues on the interaction hot spot (SaDnaA F26A and F48A)  
250 severely decreased the signal in the B2H assay, while mutating the threonine (SaDnaA  
251 T25A) had only a modest effect (**Fig 6B**). Therefore, the hot spot on DnaA domain I still  
252 interacts with its cognate adaptor in species that lack SirA, but the molecular contacts  
253 differ slightly from the complex in *B. subtilis*.

254 Out of the three residues on the DnaA hot spot investigated to this point, the  
255 contribution of the conserved threonine (T26 in BsDnaA; T25 in SaDnaA) was still  
256 unclear. Our model predicted that the interaction between DnaA and DnaD is primarily  
257 hydrophobic in *B. subtilis*, with the bulky methyl group from the threonine contributing  
258 directly to the interaction interface (**Fig 5B**). To test this further, T26 in BsDnaA was  
259 mutated to a serine which would effectively remove only the methyl group in question.  
260 This mutation is sufficient for knocking out the interaction with DnaD in a B2H (**Fig 6D**).  
261 To determine if other hydrophobic residues could substitute for T26 in the *B. subtilis*  
262 DnaA-DnaD complex, we also tested a T26M mutation and found the interaction with  
263 DnaD was maintained (**Fig 6D**). These results strongly support the model that the DnaA  
264 hot spot is providing a primarily hydrophobic surface that docks onto the DnaD wing.

## *Cryptic Interactions Regulate Initiation*

265 Therefore, it appears that the conserved threonine contributes to this hydrophobic hot  
266 spot in *B. subtilis* DnaA, but is largely dispensable in *S. aureus*.

267 The residues on the DnaA hot spot are highly conserved, yet they usually mediate  
268 species-specific contacts (32). To determine if the interaction with the DnaD adaptor is  
269 also species-specific, we tested if different DnaA homologs could bind the DnaD adaptor  
270 from either *B. subtilis* or *S. aureus* in a B2H. The results demonstrated that both BsDnaA  
271 and SaDnaA could only recognize their cognate adaptors, while *E. coli* DnaA could not  
272 recognize either DnaD homolog (**Fig 6E**). Therefore, the interaction between DnaA and  
273 DnaD is highly specific despite the fact that it relies on a conserved interaction hot spot  
274 in domain I.

275

## 276 **Discussion**

277 We have identified the protein interaction domains required to recruit and load the  
278 replicative helicase during initiation. The results indicate that most of the initiation proteins  
279 interact with the chromosome using their C-terminal ends and with their protein partners  
280 using their N-terminal ends (**Fig 7**). This is with the notable exception of the DnaB adaptor,  
281 which can bind both DNA and its protein partners with its C-terminal domain (**Figs 2C**  
282 **and 2D**). It was previously noted that truncating the C-terminal end of DnaB prevents it  
283 from being recruited to the origin and is lethal *in vivo* (33), which underscores the  
284 functional importance of this region.

285 We have also mapped the interaction surfaces in the DnaA-DnaD complex using  
286 a B2H assay. This interaction required a hydrophobic cleft in the DnaD winged helix  
287 domain (**Fig 3A**), which is usually used to bind DNA in winged helix folds (34).

## *Cryptic Interactions Regulate Initiation*

288 Interestingly, a DnaD-like plasmid initiator from *S. aureus* does use this cleft to bind DNA;  
289 however, in this case the cleft is positively charged and adopts a different conformation  
290 than the same site in *B. subtilis* DnaD (14). Therefore, the winged helix cleft is critical for  
291 DnaD-like proteins, but can be adapted for different functions. These results strongly echo  
292 licensing factors that load the replicative helicase in Eukaryotes and Archaea, which often  
293 contain winged helix domains that can bind to either DNA, protein, or both (35).

294 DnaD binds to an interaction hot spot on DnaA domain I and, critically, mutations  
295 on this surface that are not tolerated *in vivo* also knock out the interaction with DnaD (**Fig**  
296 **5A**). Therefore, we propose that this surface is essential *in vivo* because it recruits DnaD  
297 to the origin. It is also likely that SirA competes with DnaD as part of its inhibitory function.  
298 This would prevent DnaD recruitment by DnaA and thereby ensure that the origin cannot  
299 fire during sporulation. SirA also destabilizes the interaction between DnaA and *oriC in*  
300 *vivo* (5), which could be a consequence of displacing DnaD.

301 It is intriguing that the full-length DnaA, DnaD, and DnaB proteins did not interact  
302 in the B2H, yet their isolated domains could readily associate (**Figs 2C and 2D**). We  
303 propose that these complexes are regulated through conformational changes that expose  
304 cryptic protein interaction sites, which are occluded in the full-length proteins but revealed  
305 in the isolated domains. For both DnaA and DnaD, the interacting surfaces necessary for  
306 the B2H signal were also required *in vivo* [**Fig 4A** and (8)], demonstrating these surfaces  
307 are indeed functional in the context of the full-length proteins. Intriguingly, for the DnaI  
308 loader it was previously shown that the full-length protein readily interacts with its protein  
309 partner (DnaC helicase), but its DNA binding activity is cryptic (22). Regardless of which

## *Cryptic Interactions Regulate Initiation*

310 activity is masked, our results suggest that factors which lead to conformational changes  
311 may play a critical role in regulating initiation frequency in *B. subtilis*.

312

### 313 **Materials and Methods**

#### 314 **Plasmid Construction**

315 All plasmids were constructed using the Gibson assembly method (36) with the  
316 primers described in **S1 Table**. The assembled plasmids were isolated from single  
317 colonies and sent to the University of Michigan Sequencing Core for verification  
318 (<https://seqcore.brcf.med.umich.edu/>).

319 Plasmids used for the B2H assays are described in **S2 Table** including a list of all  
320 the primers used for Gibson assembly. The vectors were amplified using the following  
321 primers: pUT18C (oLM140 and oLM141), pUT18 (oLM218 and oLM217), pKT25 (oLM146  
322 and oLM147), and pKNT25 (oLM212 and oLM211).

323 Plasmids used for integrating *dnaD* variants at the *amyE* locus are described in **S3**  
324 **Table** including a list of all the primers used for Gibson assembly. All *dnaD* gene variants  
325 were cloned into pJS103 (37) which has a xylose inducible promoter driving expression  
326 of *dnaD* linked to an erythromycin resistance cassette. These regions are flanked by  
327 sequences homologous to *amyE* which allows for the plasmid to integrate at this locus  
328 through a double-crossover recombination event. The pJS103 vector was amplified by  
329 oLM197 and oLM198 in preparation for Gibson assembly.

330 Plasmids used for protein expression are described in **S4 Table** including a list of  
331 all the primers used for Gibson assembly. The gene fragment encoding the DnaD<sup>WHD</sup>  
332 (amino acids 1-128) and its variants as well as DnaB<sup>WHD</sup> (amino acids 1-153) were cloned

## *Cryptic Interactions Regulate Initiation*

333 into pET28a encoding an N-terminal HIS<sub>6</sub>-MBP-SUMO tag (38). The vector was amplified  
334 with oJS638 and oJS639 in preparation for Gibson assembly. The gene fragments  
335 encoding DnaD<sup>CTD</sup> (amino acids 129-232), DnaB<sup>CTD1</sup> (amino acids 185-300) and  
336 DnaB<sup>CTD2</sup> (amino acids 303-472) were cloned into pE-SUMO. The pE-SUMO vector was  
337 amplified using oLM1 and oLM2. Note that digesting the tag with Ulp1 protease will leave  
338 the native N-terminus of the proteins.

339 All site-directed mutagenesis was conducted using the primer extension method  
340 (39). This required the use of at least four primers: two flanking primers that amplify the  
341 desired region and two partially complementary primers that encode the desired mutation.  
342 Each flanking primer was paired with the appropriate mutagenic primer to amplify the  
343 gene in two pieces. These amplification products were then gel purified, mixed in equal  
344 molar amounts, and used as the template in a second PCR that was set with the flanking  
345 primers only.

346

### 347 **Building the *dnaD23* strain**

348 The *dnaD23* strain was created using CRISPR/Cas9 gene-editing to introduce an  
349 A166T mutation in *dnaD* using a method we developed previously (38,40). A detailed  
350 description of the process can be viewed in the supporting information section.

351

### 352 **Purification of DnaD<sup>WHD</sup> and DnaB<sup>WHD</sup>**

353 BL21 (DE3) cells were transformed with the relevant expression plasmid (**S4**  
354 **Table**) and grown at 37°C until an OD<sub>600</sub> of 0.7. Protein expression was induced using  
355 0.5 mM Isopropyl β-D-1-thiogalactopyranoside (IPTG) and the cells were incubated at

## *Cryptic Interactions Regulate Initiation*

356 37°C for 3 hours. The cells were then harvested using centrifugation, washed once with  
357 1X PBS to remove residual media, and resuspended in 50 mL buffer A (20 mM TRIS pH  
358 8.0, 300 mM NaCl, 5% glycerol, 1 mM DTT) with a protease inhibitor tablet (Complete  
359 EDTA-free, Roche). Sonication was used to lyse the sample, after which the soluble  
360 fraction was obtained through centrifugation and loaded onto a 4 mL amylose gravity  
361 column. The column was washed four times with 10 mL of buffer A, followed by eluting  
362 any bound protein using buffer A supplemented with 10 mM D-maltose while collecting 1  
363 mL fractions.

364 Fractions containing the desired protein were pooled and adjusted to 100 mM NaCl  
365 prior to digesting the HIS<sub>6</sub>-MBP-SUMO tag with Ulp1 protease for two hours at room  
366 temperature. The digested sample was filtered and loaded onto a 5 mL HiTrap™ Q FF  
367 column (GE life sciences) equilibrated with buffer B (20 mM TRIS pH 8.0, 1 mM DTT, 1  
368 mM EDTA, 5% glycerol) supplemented with 100 mM NaCl. The protein was then eluted  
369 with a 90 minute gradient from 100 mM to 500 mM NaCl at 1 mL/min and injected into a  
370 HiPrep™ 16/60 Sephacryl™ S-200 HR column (GE life sciences) using buffer B  
371 containing 150 mM NaCl at 0.75 mL/min. The final eluted sample was concentrated using  
372 an Amicon centrifugal filter (Amicon Ultra-15 with Ultracel-10 membrane). The sample  
373 was supplemented with 25% glycerol and flash frozen for storage at -80°C.

374

### **Purification of DnaD<sup>CTD</sup>, DnaB<sup>CTD1</sup>, and DnaB<sup>CTD2</sup>**

375 BL21 (DE3) cells were transformed with the relevant expression plasmid (**S4**  
376 **Table**) and grown at 37°C until an OD<sub>600</sub> of 0.7. Protein expression was induced using  
377 0.5 mM IPTG and the cells were incubated at 12°C for 16 hours. The cells were then  
378



### *Cryptic Interactions Regulate Initiation*

379 harvested using centrifugation, washed once with 1X PBS to remove residual media, and  
380 resuspended in 50 mL buffer C (20 mM TRIS pH 8.0, 400 mM NaCl, and 5% glycerol)  
381 with a protease inhibitor tablet (Complete EDTA-free, Roche). Sonication was used to  
382 lyse the sample, after which the soluble fraction was obtained through centrifugation and  
383 loaded onto a 5 mL HiTrap<sup>TM</sup> IMAC FF column (GE life sciences) equilibrated with Buffer  
384 C. The column was washed with 40 mL of Buffer C supplemented with 2 M NaCl followed  
385 by 30 mL of Buffer C with 15 mM imidazole. The bound protein was then eluted using  
386 Buffer C supplemented with 300 mM imidazole while collecting 1 mL fractions. Fractions  
387 containing the desired protein were pooled and added dropwise to 50 mL of Buffer D (20  
388 mM pH 8.0, 1 mM DTT, 5% glycerol, and 150 mM NaCl). The tag was digested using  
389 Ulp1 protease for 2 hours at room temperature.

390 The digested sample was dialyzed overnight against Buffer C at 4°C. The sample  
391 was then filtered and loaded onto a 5 mL HiTrap<sup>TM</sup> IMAC FF column equilibrated with  
392 Buffer C. The column was washed with 15 mL of Buffer C followed by 15 mL of Buffer C  
393 supplemented with 15 mM imidazole. The washes that contained the tagless protein were  
394 pooled and concentrated using an Amicon centrifugal filter (Amicon Ultra-15 with Ultracel-  
395 10 membrane). The concentrated protein was injected into a HiPrep<sup>TM</sup> 16/60 Sephacryl<sup>TM</sup>  
396 S-200 HR column (GE life sciences) using buffer E (20 mM TRIS pH 8.0, 400 mM NaCl,  
397 1 mM DTT, 1 mM EDTA, and 5% glycerol) at 0.75 mL/min. The final eluted sample was  
398 concentrated using an Amicon centrifugal filter (Amicon Ultra-15 with Ultracel-10  
399 membrane), supplemented with 25% glycerol, and flash frozen for storage at -80°C.

400

401

## 402 **Bacterial two-hybrid assays**

403 BTH101 cells were co-transformed with a plasmid encoding a T18 fusion of interest  
404 and a plasmid encoding a T25 fusion of interest (details of the specific plasmids used can  
405 be viewed in **S2 Table**). Co-transformants were grown in 3 mL of LB media  
406 (supplemented with 100 µg/mL ampicillin and 25 µg/mL kanamycin) at 37°C until an  
407 OD<sub>600</sub> of between 0.5 and 1.0. The cultures were adjusted to an OD<sub>600</sub> of 0.5, diluted  
408 1/1000 in LB, and spotted (5 µL per spot) onto LB agar plates containing 40 µg/mL of X-  
409 Gal (5-bromo-4-chloro-3-indoxyl-β-D-galactopyranoside), 0.5 mM IPTG, 100 µg/mL  
410 ampicillin, and 25 µg/mL kanamycin. The plates were incubated for two days at 30°C  
411 followed by an additional 24 hours at room temperature while being protected from light.  
412 All two-hybrid experiments were performed a minimum of three times working from fresh  
413 co-transformations.

## 415 **Chemical Cross-linking of DnaD<sup>WHD</sup>**

416 Purified DnaD<sup>WHD</sup> and its variants (16 µM final concentration) were mixed with  
417 increasing amounts of glutaraldehyde (0.03%, 0.06%, 0.12%) in 10 µL reactions  
418 containing 20 mM HEPES pH 7.7, 150 mM NaCl, 1 mM DTT, 1 mM EDTA, and 5%  
419 glycerol. Each reaction was incubated for 15 minutes at room temperature, followed by  
420 quenching with 1 µL of 1 M TRIS pH 8.0 and incubating an additional 10 minutes. SDS-  
421 loading dye (62.5 mM TRIS pH 6.8, 10% glycerol, 2% SDS, 100 mM DTT, and 0.01%  
422 bromophenol blue) was then added to the samples, which were loaded onto a 4-20%  
423 gradient SDS-polyacrylamide gel (Bio-Rad), electrophoresed in 1X TAE running buffer  
424 for 30 minutes at 200 V, and stained with coomassie blue.

425 **Complementation of *dnaD23ts* by DnaD Mutants**

426 The relevant strains (**S5 Table**) were streaked onto LB agar containing 0.001% D-  
427 xylose and incubated at 30°C (permissive temperature) or 48°C (restrictive temperature)  
428 overnight. To test for the small colony phenotype, strains were instead plated on LB agar  
429 with (1%) or without (0%) D-xylose and incubated overnight at 30°C.

430

431 **Modeling the DnaA-DnaD Complex**

432 The structures of DnaA<sup>DI</sup> (PDB 4TPS) and DnaD<sup>WHD</sup> (PDB 2V79) were used to  
433 model the interaction between the DnaA<sup>DI</sup>  $\alpha 2$ - $\alpha 3$  surface and the DnaD<sup>WHD</sup> winged helix  
434 cleft (8,20). The final model was generated using the Rosetta Docking program available  
435 on ROSIE (Rosetta Online Server that Includes Everyone) (29–31). Figures were  
436 prepared using the PyMOL Molecular Graphics System (v1.8.0.3), Schrödinger, LLC.

437

438 **Acknowledgments**

439 This work was supported by R01GM107312 to L.A.S. We wish to thank Jeremy  
440 Schroeder for contributing the pJS103 plasmid and Peter Burby for contributing the  
441 pPB41 plasmid used for CRISPR/Cas9 gene editing in *B. subtilis*.

442

443

444 **References**

- 445 1. Mott ML, Berger JM. DNA replication initiation: mechanisms and regulation in  
446 bacteria. *Nat Rev Microbiol.* 2007;5(5):343–54.
- 447 2. Marszalek J, Kaguni JM. DnaA protein directs the binding of DnaB protein in  
448 initiation of DNA replication in *Escherichia coli*. *J Biol Chem.* 1994;269(7):4883–90.
- 449 3. Sutton MD, Carr KM, Vicente M, Kaguni JM. *Escherichia coli* DnaA protein. The N-  
450 terminal domain and loading of DnaB helicase at the *E. coli* chromosomal origin. *J*  
451 *Biol Chem.* 1998;273(51):34255–62.
- 452 4. Smits WK, Goranov AI, Grossman AD. Ordered association of helicase loader  
453 proteins with the *Bacillus subtilis* origin of replication *in vivo*. *Mol Microbiol.*  
454 2010;75(2):452–61.
- 455 5. Wagner JK, Marquis KA, Rudner DZ. SirA enforces diploidy by inhibiting the  
456 replication initiator DnaA during spore formation in *Bacillus subtilis*. *Mol Microbiol.*  
457 2009;73(5):963–74.
- 458 6. Rahn-Lee L, Gorbatyuk B, Skovgaard O, Losick R. The Conserved Sporulation  
459 Protein YneE Inhibits DNA Replication in *Bacillus subtilis*. *J Bacteriol.*  
460 2009;191(11):3736–9.
- 461 7. Rahn-Lee L, Merrikh H, Grossman AD, Losick R. The Sporulation Protein SirA  
462 Inhibits the Binding of DnaA to the Origin of Replication by Contacting a Patch of  
463 Clustered Amino Acids. *J Bacteriol.* 2011;193(6):1302–7.
- 464 8. Jameson KH, Rostami N, Fogg MJ, Turkenburg JP, Grahl A, Murray H, et al.  
465 Structure and interactions of the *Bacillus subtilis* sporulation inhibitor of DNA  
466 replication, SirA, with domain I of DnaA. *Mol Microbiol.* 2014;93(5):975–91.
- 467 9. Marston FY, Grainger WH, Smits WK, Hopcroft NH, Green M, Hounslow AM, et al.  
468 When simple sequence comparison fails: the cryptic case of the shared domains of  
469 the bacterial replication initiation proteins DnaB and DnaD. *Nucleic Acids Res.*  
470 2010;38(20):6930–42.
- 471 10. Bruand C, Farache M, McGovern S, Ehrlich SD, Polard P. DnaB, DnaD and DnaI  
472 proteins are components of the *Bacillus subtilis* replication restart primosome. *Mol*  
473 *Microbiol.* 2001;42(1):245–55.
- 474 11. Hassan AK, Moriya S, Ogura M, Tanaka T, Kawamura F, Ogasawara N.  
475 Suppression of initiation defects of chromosome replication in *Bacillus subtilis dnaA*  
476 and *oriC*-deleted mutants by integration of a plasmid replicon into the  
477 chromosomes. *J Bacteriol.* 1997;179(8):2494–502.
- 478 12. Marsin S, McGovern S, Ehrlich SD, Bruand C, Polard P. Early steps of *Bacillus*  
479 *subtilis* primosome assembly. *J Biol Chem.* 2001;276(49):45818–25.

*Cryptic Interactions Regulate Initiation*

- 480 13. Rokop ME, Auchtung JM, Grossman AD. Control of DNA replication initiation by  
481 recruitment of an essential initiation protein to the membrane of *Bacillus subtilis*.  
482 Mol Microbiol. 2004;52(6):1757–67.
- 483 14. Schumacher MA, Tonthat NK, Kwong SM, Chinnam NB, Liu MA, Skurray RA, et al.  
484 Mechanism of *staphylococcal* multiresistance plasmid replication origin assembly  
485 by the RepA protein. Proc Natl Acad Sci U S A. 2014;111(25):9121–6.
- 486 15. Ishigo-oka D, Ogasawara N, Moriya S. DnaD Protein of *Bacillus subtilis* Interacts  
487 with DnaA, the Initiator Protein of Replication. J Bacteriol. 2001;183(6):2148–50.
- 488 16. Noirot-Gros M-F, Dervyn E, Wu LJ, Mervelet P, Errington J, Ehrlich SD, et al. An  
489 expanded view of bacterial DNA replication. Proc Natl Acad Sci.  
490 2002;99(12):8342–7.
- 491 17. Bruand C, Velten M, McGovern S, Marsin S, Sérèna C, Ehrlich SD, et al.  
492 Functional interplay between the *Bacillus subtilis* DnaD and DnaB proteins  
493 essential for initiation and re-initiation of DNA replication. Mol Microbiol.  
494 2004;55(4):1138–50.
- 495 18. Karimova G, Pidoux J, Ullmann A, Ladant D. A bacterial two-hybrid system based  
496 on a reconstituted signal transduction pathway. Proc Natl Acad Sci U S A.  
497 1998;95(10):5752–6.
- 498 19. Cho E, Ogasawara N, Ishikawa S. The functional analysis of YabA, which interacts  
499 with DnaA and regulates initiation of chromosome replication in *Bacillus subtilis*.  
500 Genes Genet Syst. 2008;83(2):111–25.
- 501 20. Schneider S, Zhang W, Soutanas P, Paoli M. Structure of the N-terminal  
502 oligomerization domain of DnaD reveals a unique tetramerization motif and  
503 provides insights into scaffold formation. J Mol Biol. 2008;376(5):1237–50.
- 504 21. Soutanas P. A functional interaction between the putative primosomal protein Dnal  
505 and the main replicative DNA helicase DnaB in *Bacillus*. Nucleic Acids Res.  
506 2002;30(4):966–74.
- 507 22. Ioannou C, Schaeffer PM, Dixon NE, Soutanas P. Helicase binding to Dnal  
508 exposes a cryptic DNA-binding site during helicase loading in *Bacillus subtilis*.  
509 Nucleic Acids Res. 2006;34(18):5247–58.
- 510 23. Loscha KV, Jaudzems K, Ioannou C, Su X-C, Hill FR, Otting G, et al. A novel zinc-  
511 binding fold in the helicase interaction domain of the *Bacillus subtilis* Dnal helicase  
512 loader. Nucleic Acids Res. 2009;37(7):2395–404.
- 513 24. Ashkenazy H, Erez E, Martz E, Pupko T, Ben-Tal N. ConSurf 2010: calculating  
514 evolutionary conservation in sequence and structure of proteins and nucleic acids.  
515 Nucleic Acids Res. 2010;38(Web Server issue):W529–33.

*Cryptic Interactions Regulate Initiation*

- 516 25. Celniker G, Nimrod G, Ashkenazy H, Glaser F, Martz E, Mayrose I, et al. ConSurf:  
517 Using Evolutionary Data to Raise Testable Hypotheses about Protein Function. *Isr*  
518 *J Chem.* 2013;53(3–4):199–206.
- 519 26. Glaser F, Pupko T, Paz I, Bell RE, Bechor-Shental D, Martz E, et al. ConSurf:  
520 identification of functional regions in proteins by surface-mapping of phylogenetic  
521 information. *Bioinforma Oxf Engl.* 2003;19(1):163–4.
- 522 27. Landau M, Mayrose I, Rosenberg Y, Glaser F, Martz E, Pupko T, et al. ConSurf  
523 2005: the projection of evolutionary conservation scores of residues on protein  
524 structures. *Nucleic Acids Res.* 2005;33(Web Server issue):W299-302.
- 525 28. Bruand C, Sorokin A, Serror P, Ehrlich SD. Nucleotide sequence of the *Bacillus*  
526 *subtilis dnaD* gene. *Microbiol Read Engl.* 1995;141(Pt 2):321–2.
- 527 29. Chaudhury S, Berrondo M, Weitzner BD, Muthu P, Bergman H, Gray JJ.  
528 Benchmarking and analysis of protein docking performance in Rosetta v3.2. *PloS*  
529 *One.* 2011;6(8):e22477.
- 530 30. Lyskov S, Gray JJ. The RosettaDock server for local protein-protein docking.  
531 *Nucleic Acids Res.* 2008;36(Web Server issue):W233-238.
- 532 31. Lyskov S, Chou F-C, Conchuir SO, Der BS, Drew K, Kuroda D, et al.  
533 Serverification of molecular modeling applications: the Rosetta Online Server that  
534 Includes Everyone (ROSIE). *PloS One.* 2013;8(5):e63906.
- 535 32. Zawilak-Pawlik A, Nowaczyk M, Zakrzewska-Czerwinska J. The Role of the N-  
536 Terminal Domains of Bacterial Initiator DnaA in the Assembly and Regulation of the  
537 Bacterial Replication Initiation Complex. *Genes.* 2017;8(5):136.
- 538 33. Grainger WH, Machon C, Scott DJ, Soutlanas P. DnaB proteolysis *in vivo* regulates  
539 oligomerization and its localization at *oriC* in *Bacillus subtilis*. *Nucleic Acids Res.*  
540 2010;38(9):2851–64.
- 541 34. Harami GM, Gyimesi M, Kovacs M. From keys to bulldozers: expanding roles for  
542 winged helix domains in nucleic-acid-binding proteins. *Trends Biochem Sci.*  
543 2013;38(7):364–71.
- 544 35. Khayrutdinov BI, Bae WJ, Yun YM, Lee JH, Tsuyama T, Kim JJ, et al. Structure of  
545 the Cdt1 C-terminal domain: conservation of the winged helix fold in replication  
546 licensing factors. *Protein Sci Publ Protein Soc.* 2009;18(11):2252–64.
- 547 36. Gibson DG, Young L, Chuang R-Y, Venter JC, Hutchison CA 3rd, Smith HO.  
548 Enzymatic assembly of DNA molecules up to several hundred kilobases. *Nat*  
549 *Methods.* 2009;6(5):343–5.

*Cryptic Interactions Regulate Initiation*

- 550 37. Liao Y, Schroeder JW, Gao B, Simmons LA, Biteen JS. Single-molecule motions  
551 and interactions in live cells reveal target search dynamics in mismatch repair. Proc  
552 Natl Acad Sci U S A. 2015;112(50):E6898-6906.
- 553 38. Burby PE, Simmons LA. MutS2 Promotes Homologous Recombination in *Bacillus*  
554 *subtilis*. Gourse RL, editor. J Bacteriol. 2017;199(2):e00682-16.
- 555 39. Reikofski J, Tao BY. Polymerase chain reaction (PCR) techniques for site-directed  
556 mutagenesis. Biotechnol Adv. 1992;10(4):535–47.
- 557 40. Burby PE, Simmons LA. CRISPR/Cas9 Editing of the *Bacillus subtilis* Genome.  
558 Bio-Protoc. 2017;7(8):e2272.
- 559

560 **Figure Legends**

561  
562 **Figure 1. Full-length DnaA, DnaD and DnaB do not interact in a B2H assay. (A)** A  
563 schematic of the helicase loading pathway in *B. subtilis*. Black arrows indicate potential  
564 protein-protein interactions while blue curved arrows indicate self-interactions. **(B)** B2H  
565 of T18- with T25-tagged DnaD (top) or DnaB (bottom) to demonstrate self-interactions  
566 mediated by the adaptor proteins. **(C)** B2H of T18-tagged DnaD co-expressed with  
567 either T25-tagged DnaA, wild type DnaB (DnaB<sup>WT</sup>), or the gain-of-function DnaB variant  
568 (DnaB<sup>S371P</sup>).

569  
570 **Figure 2. Mapping Interacting Domains Involved in DNA Replication Initiation. (A)**  
571 Schematic of DnaA, DnaD, DnaB, DnaC, and DnaI divided into their individual domains.  
572 Amino acid boundaries of each protein fragment are indicated. WHD = Winged Helix  
573 Domain; CTD = C-terminal Domain; NTD = N-terminal Domain; ZBD = Zinc Binding  
574 Domain. **(B)** SDS-polyacrylamide gel showing purified domains from DnaD and DnaB.  
575 **(C)** B2H of T25-tagged DnaA domains co-expressed with T18-tagged full-length YabA  
576 (YabA<sup>FL</sup>), full-length SirA (SirA<sup>FL</sup>), or the domains from DnaD. **(D)** B2H of T25-tagged  
577 DnaB domains co-expressed with T18-tagged DnaD domains. **(E)** B2H of T25-tagged  
578 DnaB domains co-expressed with T18-tagged DnaC domains. **(F)** B2H of T25-tagged  
579 DnaI domains co-expressed with T18-tagged DnaC domains.

580  
581 **Figure 3. The DnaD<sup>WHD</sup> Wing Forms a Binding Cleft for DnaA. (A)** The crystal  
582 structure of DnaD<sup>WHD</sup> (PDB 2V79) is shown as a surface representation and colored  
583 according to sequence conservation as indicated in the legend (top). The boxed inset



## *Cryptic Interactions Regulate Initiation*

584 shows a semi-transparent surface with F51, I83 and E95 represented as sticks. **(B)** B2H  
585 of T18-tagged DnaD<sup>WHD</sup> variants co-expressed with either T25-tagged DnaA<sup>DI</sup>, DnaB<sup>FL</sup>  
586 or DnaD<sup>WHD</sup>. **(C)** SDS-polyacrylamide gel stained with coomassie blue showing the  
587 glutaraldehyde cross-linking of wild type DnaD<sup>WHD</sup> (WT) or the F51A and I83A variants  
588 to reveal self-interactions. The various oligomeric forms are symbolized by dots at the  
589 right-hand side of the gel, with each dot representing one DnaD<sup>WHD</sup> protomer. The  
590 molecular weight marker is labeled on the left-hand side in kDa.

591

592 **Figure 4. The DnaD<sup>WHD</sup> Binding Cleft is Essential.** **(A)** *dnaD23* strains ectopically  
593 expressing WT DnaD or its winged helix variants (F51A or I83A) were incubated at the  
594 permissive temperature (30°C) or the restrictive temperature (48°C). The *dnaD23*  
595 parental strain was also included as a control (labeled “None” on the plates). **(B)** The  
596 same strains described in **(A)** were also incubated at the permissive temperature  
597 without (0%) or with (1%) xylose induction. Small colonies indicate a growth defect upon  
598 DnaD over-expression.

599

600 **Figure 5. DnaD<sup>WHD</sup> Binds to the DnaA<sup>DI</sup> hot spot.** **(A)** B2H of T25-tagged DnaA<sup>DI</sup>  
601 variants co-expressed with T18-tagged SirA or DnaD<sup>WHD</sup>. “Viable” and “non-viable” refer  
602 to the effect these DnaA variants have when introduced into *B. subtilis*. **(B)** Model of the  
603 DnaD<sup>WHD</sup> and DnaA<sup>DI</sup> complex. DnaA<sup>DI</sup> is represented as a green ribbon diagram with  
604  $\alpha 2$  and  $\alpha 3$  labeled, while DnaD<sup>WHD</sup> is shown as a white surface. The conserved  
605 residues that line the binding cleft in DnaD<sup>WHD</sup> are colored with F51 in orange, I83 in  
606 blue, and E95 in red. The boxed inset shows a zoomed view of the interaction interface

## Cryptic Interactions Regulate Initiation

607 with the DnaD<sup>WHD</sup> F51, I83 and E95 sidechains shown as spheres. DnaD<sup>WHD</sup> I76 is also  
608 shown and colored in grey. The DnaA<sup>DI</sup> interacting residues (T26, W27 and F49) are  
609 shown as green sticks with oxygen atoms colored red and nitrogen atoms colored blue.  
610 **(C)** B2H of T25-tagged DnaA<sup>DI</sup> co-expressed with T18-tagged DnaD<sup>WHD</sup> variants.

611  
612 **Figure 6. DnaD Binds to the DnaA domain I hot spot in *S. aureus*.** **(A)** Schematic of  
613 DnaA demonstrating three different possibilities in bacteria: species that have both the  
614 DnaD adaptor and SirA regulator, species that have DnaD but lack SirA, and species  
615 that lack DnaD and SirA. **(B)** B2H of T18-tagged SaDnaD<sup>WHD</sup> co-expressed with T25-  
616 tagged variants of SaDnaA<sup>DI</sup>. **(C)** Sequence alignment of the DnaA hot spot from *B.*  
617 *subtilis*, *S. aureus*, and *E. coli*. The three hot spot residues mutated in the B2H assays  
618 are highlighted in yellow, with residues critical for the DnaD interaction in *B. subtilis*  
619 indicated by blue arrow heads. Residues critical for the direct interaction between *E. coli*  
620 DnaA and the replicative helicase are indicated by red arrow heads. The numbering at  
621 the top of the alignment refers to the *B. subtilis* sequence. **(D)** B2H of T18-tagged  
622 BsDnaD<sup>WHD</sup> variants co-expressed with T25-tagged BsDnaA<sup>DI</sup>. **(E)** B2H of T25-tagged  
623 DnaA<sup>DI</sup> from *B. subtilis* (Bs), *S. aureus* (Sa) or *E. coli* (Ec) co-expressed with T18-  
624 tagged BsDnaD<sup>WHD</sup> or SaDnaD<sup>WHD</sup>.

625  
626 **Figure 7. Model of Protein and DNA Interacting Domains Used for Initiation.**  
627 Protein binding domains are colored in blue with interactions marked by curved blue  
628 arrows, while DNA binding domains are outlined in yellow. Domains are labeled

*Cryptic Interactions Regulate Initiation*

629 according to Figure 2A and oriented with the N-terminal ends pointed up (NT) and the

630 C-terminal ends pointed down (CT).

631

632 **Supporting Information**

633  
634 **S1 Fig. Detecting Interactions Between DnaA, DnaD and DnaB Using Minimal**

635 **Media with Maltose.**

636 B2H of T18-tagged DnaD domains co-expressed with either T25-tagged DnaA domains  
637 **(A)** or T25-tagged DnaB domains **(B)** grown on LB or minimal media supplemented with  
638 0.2% D-maltose (MM + Maltose). Red boxes indicate positive interactions.

639

640 **S2 Fig. The DnaD<sup>WHD</sup> NT Extension is Not Necessary for Protein Interactions.**

641 **(A)** Schematic of DnaD<sup>WHD</sup> showing the N-terminal extension (residues 1-18) that  
642 mediates tetramerization. **(B)** Size exclusion chromatogram of either wild type DnaD<sup>WHD</sup>  
643 (black) or the  $\Delta$ NT variant (blue) with elution volume (mL) labeled on the x-axis and  
644 absorbance at 280 nm ( $A_{280}$ ) labeled on the y-axis. The  $\Delta$ NT variant elutes later than  
645 expected for the tetramer (size of the  $\Delta$ NT tetramer is 51.9 kDa) demonstrating that this  
646 truncation has shifted the equilibrium to favor the dimer. **(C)** B2H of T18-tagged wild  
647 type DnaD<sup>WHD</sup> or the  $\Delta$ NT variant co-expressed with T25-tagged DnaA<sup>DI</sup>, DnaB<sup>WHD</sup> or  
648 DnaB<sup>CTD2</sup>.

649

650 **S3 Fig. Detecting Interactions with the DnaC Helicase Using Minimal Media with**

651 **Maltose.**

652 B2H of T18-tagged DnaC domains co-expressed with either T25-tagged DnaI domains  
653 **(A)** or T25-tagged DnaB domains **(B)** grown on LB or minimal media supplemented with  
654 0.2% D-maltose (MM + Maltose). Red boxes indicate positive interactions.

655

656 **S1 Table. Primers Used to Construct Plasmids.**

657

658 **S2 Table. Plasmid List for B2H Assay.**

659

660 **S3 Table. Plasmids Used to Integrate *dnaD* Variants at the *amyE* Locus.**

661

662 **S4 Table. Plasmids Used for Protein Purifications.**

663

664 **S5 Table. *B. subtilis* Strains Used in this Study.**

665

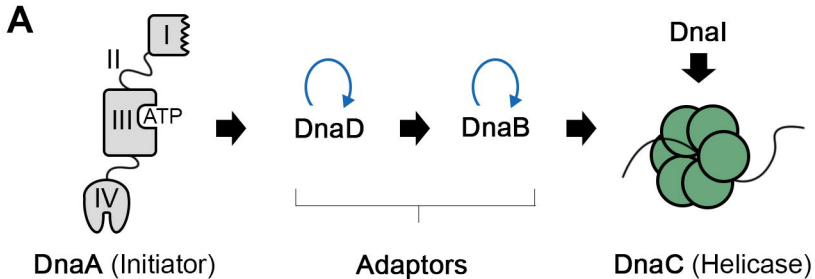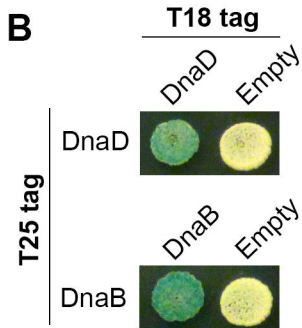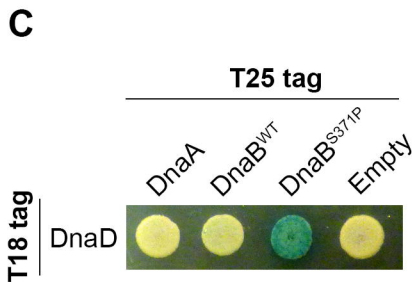

**A**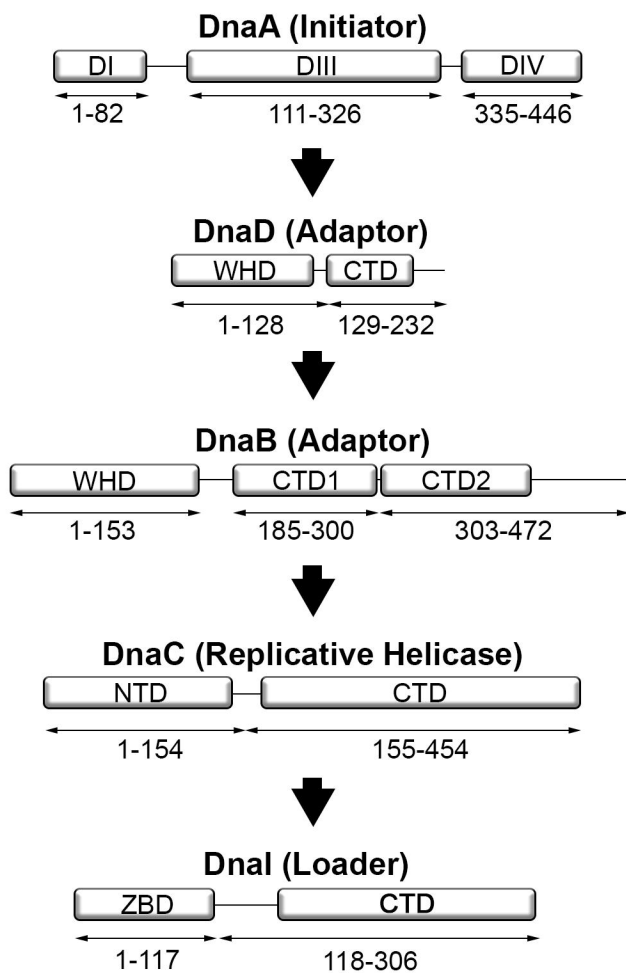**C**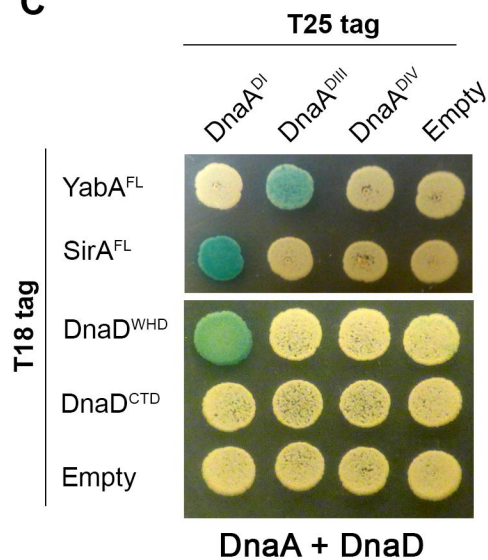**D**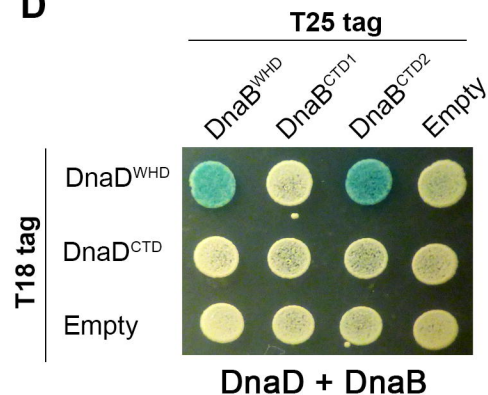**B**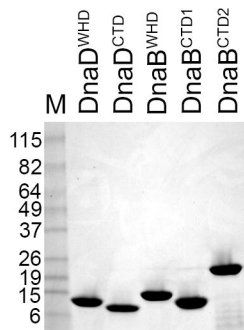**E**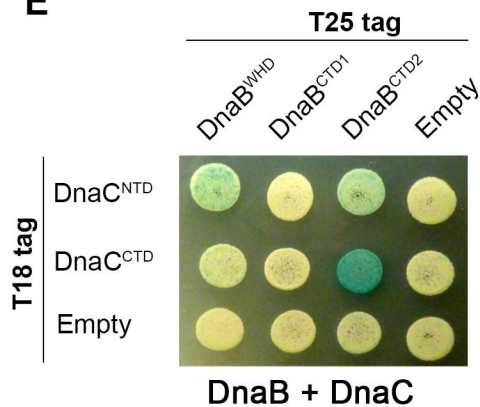**F**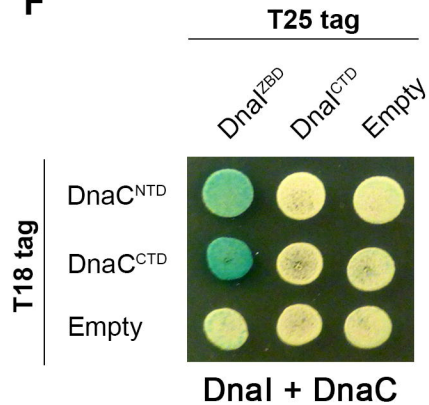

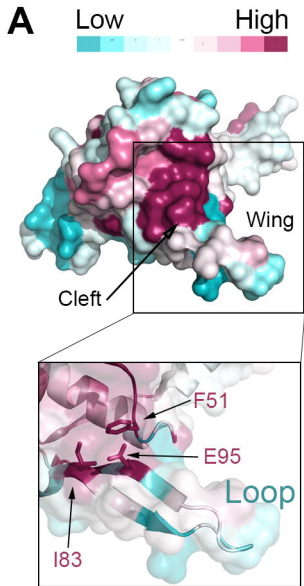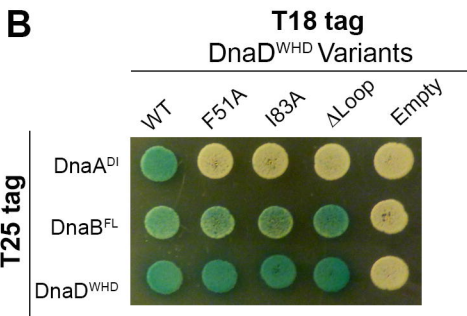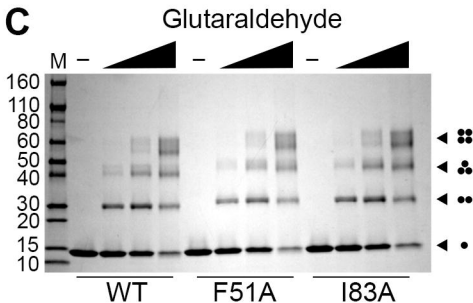



**A** **0.001% Xylose**

---

**30°C**

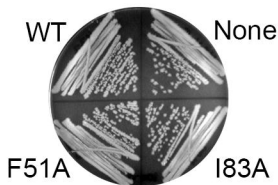

**48°C**

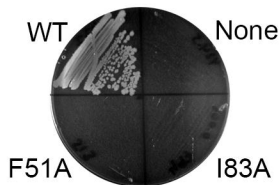

**B** **30°C**

---

**0% Xylose**

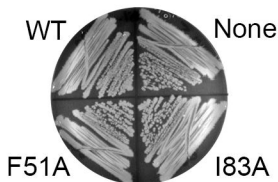

**1% Xylose**

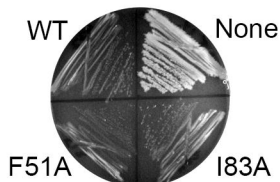

**A**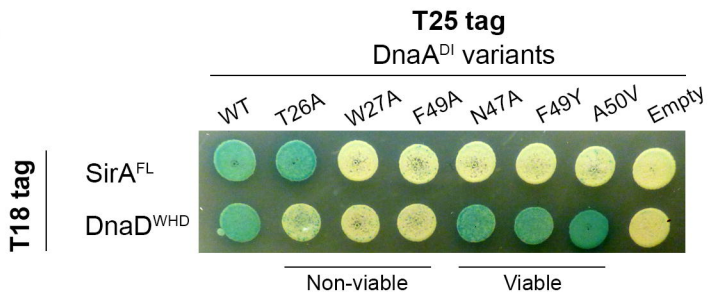**B**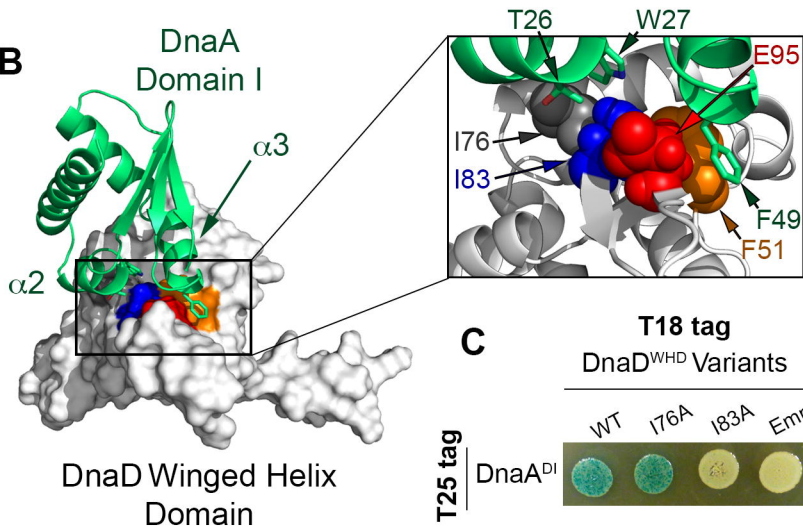

**A**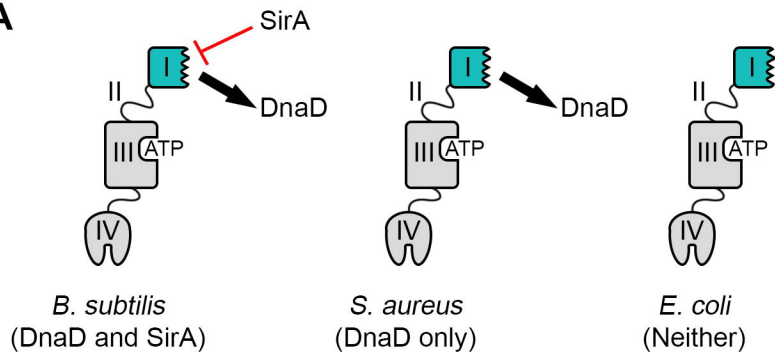**B**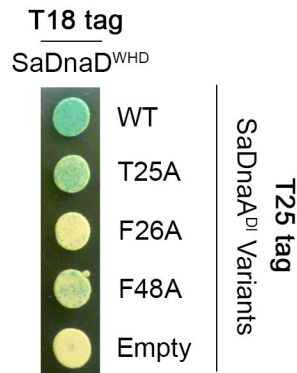**C**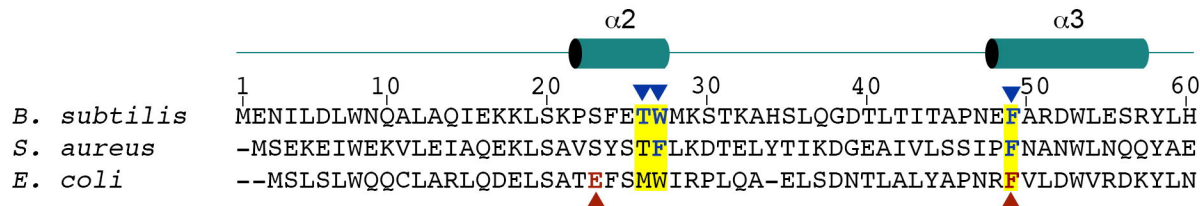**D**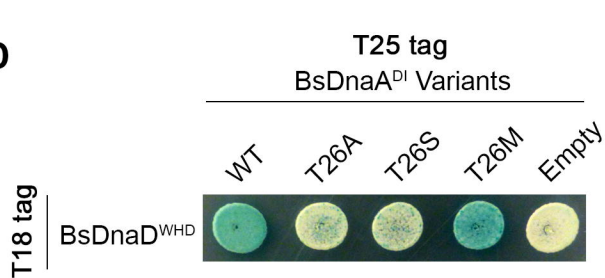**E**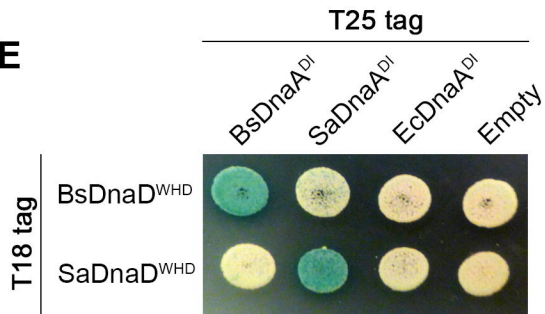

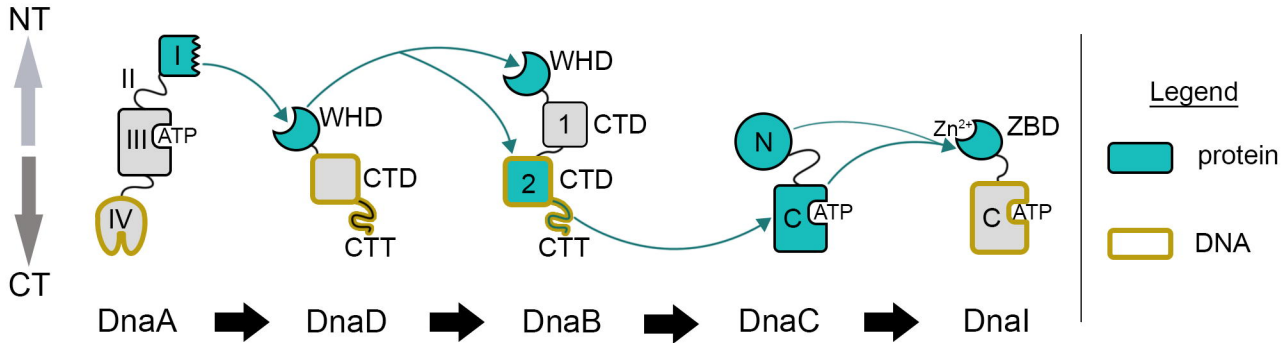

Source: https://www.biorxiv.org/content/10.1101/313882v1.full.pdf
